# Supplementary material for: A practical approach to diagnosing adult onset leukodystrophies
Source: HighWire-hosted journal article supplement (doi:10.1136/jnnp-2013-305888), 2013-12-19
Supplement: jnnp-2013-305888supp1.pdf [file jnnp-2013-305888supp1.pdf]

**Supplementary table 1: Initial (round 1) investigations (on-line supplement)**

| Investigation                                                                                                                                                                   | Comments                                                                                                                                                                  |
|---------------------------------------------------------------------------------------------------------------------------------------------------------------------------------|---------------------------------------------------------------------------------------------------------------------------------------------------------------------------|
| <i>Blood</i>                                                                                                                                                                    |                                                                                                                                                                           |
| <b>FBC/ ESR/ Vitamin B12/ folate/ total homocysteine/ methylmalonic acid/ electrolytes/ liver function tests/ thyroid function/ lipids</b>                                      | Total homocysteine and methylmalonic acid levels are a better functional indicator of B12 deficiency than B12 levels alone.                                               |
| <b>Syphilis serology/ HIV/ Hepatitis B and C serology</b>                                                                                                                       |                                                                                                                                                                           |
| <b>ANA/ ENA/ ANCA/ Double stranded DNA/ Lupus anticoagulant, anti-cardiolipin antibodies/ complement/ immunoglobulins- electrophoresis/ serum ACE/ anti-neuronal antibodies</b> | Neuro-inflammatory syndromes to be considered include neurosarcoidosis, neurolupus and paraneoplastic conditions.                                                         |
| <b>Vitamin E/ Copper, Caeruloplasmin/ lactate/ ammonia/ carbon monoxide</b>                                                                                                     |                                                                                                                                                                           |
| <i>CSF</i>                                                                                                                                                                      |                                                                                                                                                                           |
| <b>CSF: Protein, MC and S, glucose, oligoclonal bands (with matched serum), tau and A<math>\beta</math></b>                                                                     | A raised tau level, and decreased A $\beta$ -42 level are seen in Alzheimer's disease, giving an increased ratio of tau to A $\beta$ -42 (lab dependent but typically >1) |
|                                                                                                                                                                                 |                                                                                                                                                                           |
| <i>Imaging and other investigations</i>                                                                                                                                         |                                                                                                                                                                           |
| <b>MRI: standard MRI brain/ cervical spine plus Gadolinium; T2* can identify microhaemorrhages</b>                                                                              | Classify the pattern of white matter change (see table 4)                                                                                                                 |
| <b>FDG-PET</b>                                                                                                                                                                  | To exclude underlying inflammatory conditions (eg. sarcoidosis) and malignancy                                                                                            |
| <b>Nerve conduction studies</b>                                                                                                                                                 |                                                                                                                                                                           |
| <b>Visual evoked potentials</b>                                                                                                                                                 |                                                                                                                                                                           |

**Supplementary Figure 1: (on-line supplement)**

Magnetic Resonance Imaging (MRI) of a middle-aged patient with a two-year history of gait and cognitive difficulties. Axial T2-weighted (a & b) and coronal T1-weighted acquisitions demonstrate fairly symmetrical and predominantly frontal periventricular and deep white matter T2-weighted signal hyperintensity and volume loss, particularly of the corpus callosum. Note the ex-vacuo dilatation of the lateral ventricles secondary to the atrophy.

**Supplementary Figure 2: (on-line supplement)**

Suggested algorithm for the evaluation of an adult with a suspected leukodystrophy
