# Supplementary figures and images for: A practical approach to diagnosing adult onset leukodystrophies
Source: HighWire-hosted journal article supplement (doi:10.1136/jnnp-2013-305888), 2013-12-19

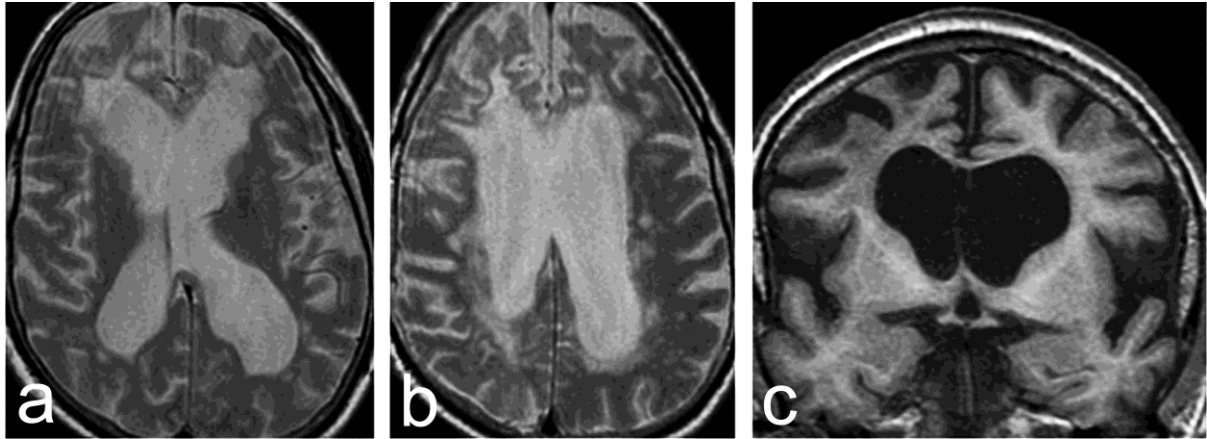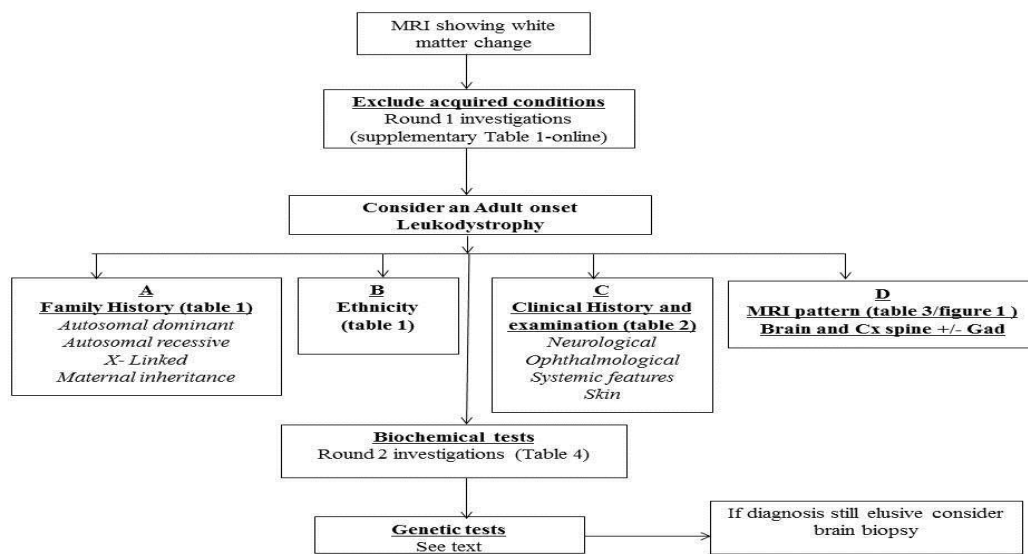

Supplement: jnnp-2013-305888supp_figure.pdf [file jnnp-2013-305888supp_figure.pdf]
